# Supplementary material for: Identifying Protein Features and Pathways Responsible for Toxicity Using Machine Learning and Tox21: Implications for Predictive Toxicology
Source: MDPI journal article supplement (doi:10.3390/molecules27093021), 2022-05-08
Supplement: s1 [file s1]

# Supplementary Materials: Identifying Protein Features and Pathways Responsible for Toxicity Using Machine Learning and Tox21: Implications for Predictive Toxicology

Lama Moukheiber <sup>1</sup>, William Mangione <sup>2</sup>, Mira Moukheiber <sup>2</sup>, Saeed Maleki <sup>3</sup>, Zackary Falls <sup>2</sup>, Mingchen Gao <sup>1,\*</sup> and Ram Samudrala <sup>2,\*</sup>

**Table S1.** Protein identifiers and names associated with the NR-AhR toxicity pathway enrichment analysis.

| Gene identifier | UniProt ID | Protein name                                                |
|-----------------|------------|-------------------------------------------------------------|
| BRCA1           | P38398     | Breast cancer type 1 susceptibility protein                 |
| CNTN1           | Q12860     | Contactin-1                                                 |
| GIN52           | Q9Y248     | DNA replication complex GINS protein PSF2                   |
| GLB1            | P16278     | Beta-galactosidase                                          |
| GP1BB           | P13224     | Platelet glycoprotein Ib beta chain                         |
| LGR5            | O75473     | Leucine-rich repeat-containing G-protein coupled receptor 5 |
| LRP6            | O75581     | Low-density lipoprotein receptor-related protein 6          |
| NANP            | Q8TBE9     | N-acetylneuraminase-9-phosphatase                           |
| NCAM1           | P13591     | Neural cell adhesion molecule 1                             |
| NRCAM           | Q92823     | Neuronal cell adhesion molecule                             |
| NRP1            | O14786     | Neuropilin-1                                                |
| NSD2            | O96028     | Histone-lysine N-methyltransferase NSD2                     |
| PCGF5           | Q86SE9     | Polycomb group RING finger protein 5                        |
| PIAS3           | Q9Y6X2     | E3 SUMO-protein ligase PIAS3                                |
| PROCR           | Q9UNN8     | Endothelial protein C receptor                              |
| RBX1            | P62877     | E3 ubiquitin-protein ligase RBX1                            |
| RNF125          | Q96EQ8     | E3 ubiquitin-protein ligase RNF125                          |
| RNF2            | Q99496     | E3 ubiquitin-protein ligase RING2                           |
| RNF8            | O76064     | E3 ubiquitin-protein ligase RNF8                            |
| RPA1            | P27694     | Replication protein A 70 kDa DNA-binding subunit            |
| TEAD1           | P28347     | Transcriptional enhancer factor TEF-1                       |
| TEAD4           | Q15561     | Transcriptional enhancer factor TEF-3                       |
| TRAF2           | Q12933     | TNF receptor-associated factor 2                            |
| TRAF6           | Q9Y4K3     | TNF receptor-associated factor 6                            |
| UBE2N           | P61088     | Ubiquitin-conjugating enzyme E2 N                           |
| UHRF2           | Q96PU4     | E3 ubiquitin-protein ligase UHRF2                           |
